# Supplementary material for: A Survey of Medical Oncology Training in Australian Medical Schools: Pilot Study
Source: PubMed Central journal article supplement (PMC5743919; doi:10.2196/mededu.7903), 2017-12-12
Supplement: mededu_v3i2e23_app1.pdf [file mededu_v3i2e23_app1.pdf]

## Multimedia Appendix 1

### Survey questions

- 1) In which University are you studied?
- 2) What was your clinical school?
- 3) In which year you were introduced to medical oncology?
  - A. 1st year
  - B. 2nd year
  - C. 3rd year
  - D. 4th year
  - E. 5th year
  - F. 6th year
  - G. Never
- 4) How was medical oncology taught?
  - A. Theory only
  - B. Clinical rotation
  - C. Both of above
  - D. Never
- 5) How many weeks were you assigned to medical oncology teaching?
  - A. 1-5 weeks
  - B. 5-10 weeks
  - C. 10 or more weeks
  - D. None
- 6) Kindly specify the number of weeks of medical oncology teaching.
- 7) Is medical oncology a rotation on its own?
  - A. Yes
  - B. Combined with another
  - C. Unsure
- 8) How were you assessed in medical oncology?
  - A. Theory only
  - B. Clinical examination
  - C. Both of above
  - D. Never
- 9) Is a rotation in medical oncology compulsory?
  - A. Mandatory
  - B. Elective
  - C. Unsure
- 10) How would you rate the quality of medical oncology teaching in your medical curriculum?
  - A. Satisfactory
  - B. Average
  - C. Unsatisfactory
- 11) Reasons of unsatisfactory training in medical oncology
  - A. Lack of consultant teaching sessions
  - B. Limited hours of teaching
  - C. Lack of clinical exposure
  - D. Limited resources
- 12) Reasons for satisfactory training in medical oncology

- A. Consultant teaching
  - B. Adequate teaching hours
  - C. Adequate clinical exposure
  - D. Adequate resources
- 13) Are there any medical oncologists who teach at your university?
- A. Yes
  - B. No
  - C. Unsure
- 14) In your opinion, medical oncology should be taught as -
- A. A subject on its own
  - B. In combination with other subjects/specialities
- 15) In which of the following topics should more emphasis be given?
- A. Molecular biology
  - B. Pathophysiology
  - C. Pathology
  - D. Clinical applications
  - E. Diagnostic investigations
  - F. Treatment approaches
  - G. Psychosocial aspects of medicine
  - H. Others (please specify)
- 16) How would you rate the importance of medical oncology as a future career?
- A. High
  - B. Low
- 17) What is your field of preference for future training?
- A. Adult medicine (including medical oncology)
  - B. Surgery
  - C. Radiation oncology
  - D. Radiology
  - E. Pathology
  - F. Other
- 18) In your opinion, what would be the reason for not choosing medical oncology as a career?
- A. Lack of exposure at an undergraduate level
  - B. Lack of awareness
